# Supplementary material for: Economic evaluation of interventions delivered by primary care providers to improve neurodevelopment in children aged under 5 years: protocol for a scoping review
Source: Springer Nature journal article supplement (doi:10.1186/s13643-017-0450-6), 2017-03-21
Supplement: MOESM2 [file 12157888]

## ADDITIONAL FILE 2 – SEARCH STRATEGY

### MEDLINE (OVID)

| #  | Searches                                                                  |
|----|---------------------------------------------------------------------------|
| 1  | Economics/                                                                |
| 2  | "costs and cost analysis"/                                                |
| 3  | Cost allocation/                                                          |
| 4  | Cost-benefit analysis/                                                    |
| 5  | Cost control/                                                             |
| 6  | Cost of illness/                                                          |
| 7  | Cost savings/                                                             |
| 8  | Cost sharing/                                                             |
| 9  | Medical savings accounts/                                                 |
| 10 | Health care costs/                                                        |
| 11 | Direct service costs/                                                     |
| 12 | Employer health costs/                                                    |
| 13 | Hospital costs/                                                           |
| 14 | Health expenditures/                                                      |
| 15 | Capital expenditures/                                                     |
| 16 | Value of life/                                                            |
| 17 | exp economics, hospital/                                                  |
| 18 | exp economics, medical/                                                   |
| 19 | Economics, nursing/                                                       |
| 20 | exp "fees and charges"/                                                   |
| 21 | exp budgets/                                                              |
| 22 | (low adj cost).mp.                                                        |
| 23 | (high adj cost).mp.                                                       |
| 24 | (health?care adj cost\$).mp.                                              |
| 25 | (fiscal or funding or financial or finance).tw.                           |
| 26 | (cost adj estimate\$).mp.                                                 |
| 27 | (cost adj variable).mp.                                                   |
| 28 | (unit adj cost\$).mp.                                                     |
| 29 | cost\$.mp.                                                                |
| 30 | OR 1-29                                                                   |
| 31 | exp Child/                                                                |
| 32 | exp Infant/                                                               |
| 33 | (child\$ or infan\$ or baby or babies or preschool\$ or pre-school\$).tw. |
| 34 | OR 31-33                                                                  |
| 35 | exp Pregnancy/                                                            |
| 36 | exp Maternal Health Services/                                             |
| 37 | exp Postpartum Period/                                                    |
| 38 | antepart\$.mp.                                                            |
| 39 | pregnan\$.mp.                                                             |

|    |                                                                                                                                                                                                                                                                                                                                                                              |
|----|------------------------------------------------------------------------------------------------------------------------------------------------------------------------------------------------------------------------------------------------------------------------------------------------------------------------------------------------------------------------------|
| 40 | prenatal\$.mp.                                                                                                                                                                                                                                                                                                                                                               |
| 41 | antenatal\$.mp.                                                                                                                                                                                                                                                                                                                                                              |
| 42 | perinatal\$.mp.                                                                                                                                                                                                                                                                                                                                                              |
| 43 | postnatal\$.mp.                                                                                                                                                                                                                                                                                                                                                              |
| 44 | postpart\$.mp.                                                                                                                                                                                                                                                                                                                                                               |
| 45 | OR 35-44                                                                                                                                                                                                                                                                                                                                                                     |
| 46 | Patient Education as Topic/                                                                                                                                                                                                                                                                                                                                                  |
| 47 | exp health education/                                                                                                                                                                                                                                                                                                                                                        |
| 48 | patient care.ti,ab.                                                                                                                                                                                                                                                                                                                                                          |
| 49 | (patient? adj3 (educat\$ or counsel\$ or helping or advising or directing or caring or assist? or assisting or assistance or teaching or learning or promoting)).ti,ab.                                                                                                                                                                                                      |
| 50 | (health adj2 (improv\$ or promotion)).ti,ab.                                                                                                                                                                                                                                                                                                                                 |
| 51 | exp health promotion/                                                                                                                                                                                                                                                                                                                                                        |
| 52 | public health/                                                                                                                                                                                                                                                                                                                                                               |
| 53 | preventive medicine/                                                                                                                                                                                                                                                                                                                                                         |
| 54 | primary prevention/                                                                                                                                                                                                                                                                                                                                                          |
| 55 | "Early Intervention (Education)"/                                                                                                                                                                                                                                                                                                                                            |
| 56 | exp Preventive Health Services/                                                                                                                                                                                                                                                                                                                                              |
| 57 | Early Medical Intervention/                                                                                                                                                                                                                                                                                                                                                  |
| 58 | Consumer Health Information/                                                                                                                                                                                                                                                                                                                                                 |
| 59 | Health Literacy/                                                                                                                                                                                                                                                                                                                                                             |
| 60 | mass screening/                                                                                                                                                                                                                                                                                                                                                              |
| 61 | medical history taking/                                                                                                                                                                                                                                                                                                                                                      |
| 62 | population surveillance/                                                                                                                                                                                                                                                                                                                                                     |
| 63 | early diagnosis/                                                                                                                                                                                                                                                                                                                                                             |
| 64 | (monitor\$ or screen\$ or surveillance or assessment\$.tw.                                                                                                                                                                                                                                                                                                                   |
| 65 | case finding.tw.                                                                                                                                                                                                                                                                                                                                                             |
| 66 | exp community health services/                                                                                                                                                                                                                                                                                                                                               |
| 67 | house call/                                                                                                                                                                                                                                                                                                                                                                  |
| 68 | (((home* or in-home* or at-home*) adj3 nurs*) not nursing next home*).mp.<br>[mp=title, abstract, original title, name of substance word, subject heading word, keyword heading word, protocol supplementary concept word, rare disease supplementary concept word, unique identifier]                                                                                       |
| 69 | ((home* or in-home* or at-home* or house* or domicil* or communit* or neighborhood* or neighbourhood*) adj5 (visit* or support* or program* or intervention*)).mp. [mp=title, abstract, original title, name of substance word, subject heading word, keyword heading word, protocol supplementary concept word, rare disease supplementary concept word, unique identifier] |
| 70 | anticipatory guidance.mp.                                                                                                                                                                                                                                                                                                                                                    |
| 71 | primary care/                                                                                                                                                                                                                                                                                                                                                                |
| 72 | motivational interviewing.mp. or exp Motivational Interviewing/                                                                                                                                                                                                                                                                                                              |
| 73 | exp child health services/ or exp community health nursing/                                                                                                                                                                                                                                                                                                                  |
| 74 | general health check.mp.                                                                                                                                                                                                                                                                                                                                                     |
| 75 | counsel\$.mp.                                                                                                                                                                                                                                                                                                                                                                |
| 76 | exp Counseling/ec, ed [Economics, Education]                                                                                                                                                                                                                                                                                                                                 |
| 77 | exp child development/                                                                                                                                                                                                                                                                                                                                                       |

|    |                                                                                                      |
|----|------------------------------------------------------------------------------------------------------|
| 78 | (development\$ adj2 (delay\$ or deviat\$ or disabilit\$ or disorder\$ or milestone\$ or risk\$)).tw. |
| 79 | language development disorders/                                                                      |
| 80 | speech disorders/                                                                                    |
| 81 | ((speech or language) adj2 (delay\$ or disorder\$)).tw.                                              |
| 82 | communication disorders/                                                                             |
| 83 | (communication adj2 (delay\$ or disorder\$)).tw.                                                     |
| 84 | Motor Skills/                                                                                        |
| 85 | ((motor or psychomotor) adj2 (delay\$ or disabilit\$ or disorder\$)).tw.                             |
| 86 | adaptive behavior/                                                                                   |
| 87 | (cogniti\$ adj2 (delay\$ or deviat\$ or disabilit\$ or disorder\$ or milestone\$ or risk\$)).mp.     |
| 88 | exp adaptation, psychological/ or exp child development/                                             |
| 89 | OR 46-76                                                                                             |
| 90 | OR 77-88                                                                                             |
| 91 | 34 or 45                                                                                             |
| 92 | 30 and 89 and 90 and 91                                                                              |
| 93 | limit 92 to yr="2005 -Current"                                                                       |
